# Supplementary material for: Genome-wide analysis of DNA G-quadruplex motifs across 37 species provides insights into G4 evolution
Source: PubMed Central journal article supplement (PMC7822830; doi:10.1038/s42003-020-01643-4), 2021-01-22
Supplement: 42003_2020_1643_MOESM2_ESM.pdf [file 42003_2020_1643_MOESM2_ESM.pdf]

## SUPPLEMENTARY INFORMATION

### **Genome-wide analysis of DNA G-quadruplex motifs across 37 species provides insights into G4 evolution**

Feng Wu<sup>1,6</sup>, Kangkang Niu<sup>1,6</sup>, Yong Cui<sup>1,6</sup>, Cencen Li<sup>2</sup>, Mo Lyu<sup>1</sup>, Yandong Ren<sup>3</sup>, Yanfei Chen<sup>1</sup>, Huimin Deng<sup>1</sup>, Lihua Huang<sup>1</sup>, Sichun Zheng<sup>1</sup>, Lin Liu<sup>1</sup>, Jian Wang<sup>4</sup>, Qisheng Song<sup>5,\*</sup>, Hui Xiang<sup>1,\*</sup> and Qili Feng<sup>1,\*</sup>

<sup>1</sup> Guangdong Provincial Key Laboratory of Insect Developmental Biology and Applied Technology, Guangzhou Key Laboratory of Insect Development Regulation and Application Research, Institute of Insect Science and Technology, School of Life Sciences, South China Normal University, Guangzhou, 510631, China.

<sup>2</sup> College of Life Sciences, Xinyang Normal University, Xinyang, 464000, China.

<sup>3</sup> Center for Ecological and Environmental Sciences, Northwestern Polytechnical University, Xi'an, 710129, China.

<sup>4</sup> Department of Entomology, University of Maryland, College Park, MD 20742, USA

<sup>5</sup> Division of Plant Sciences, University of Missouri, Columbia, MO 65211, USA

<sup>6</sup>These authors contributed equally.

\* To whom correspondence should be addressed. Correspondence may also be addressed to Qili Feng, Tel: +86 20 85215291; Fax: +86 20 85215291; Email: qlfeng@scnu.edu.cn; Hui Xiang, Tel: +86 20 85210024; Fax: +86 20 85215291; Email: xiang\_shine@foxmail.com and Qisheng Song, Tel: +1 573 8829798; Fax: +1 573 8821469; Email: songq@missouri.edu

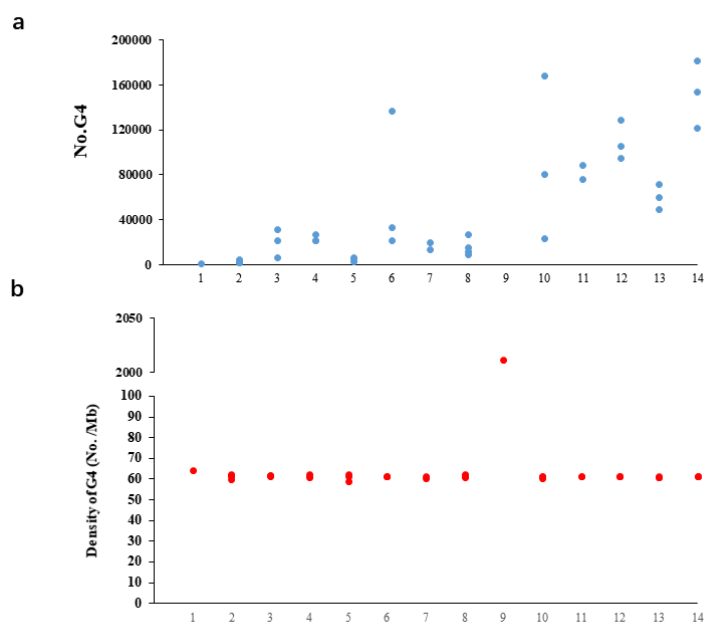

**Supplementary Fig. 1** G4 motifs in the random sequences with same sizes to the 37 species of the 14 representative evolutionary nodes. a. G4 number. b. G4 density.

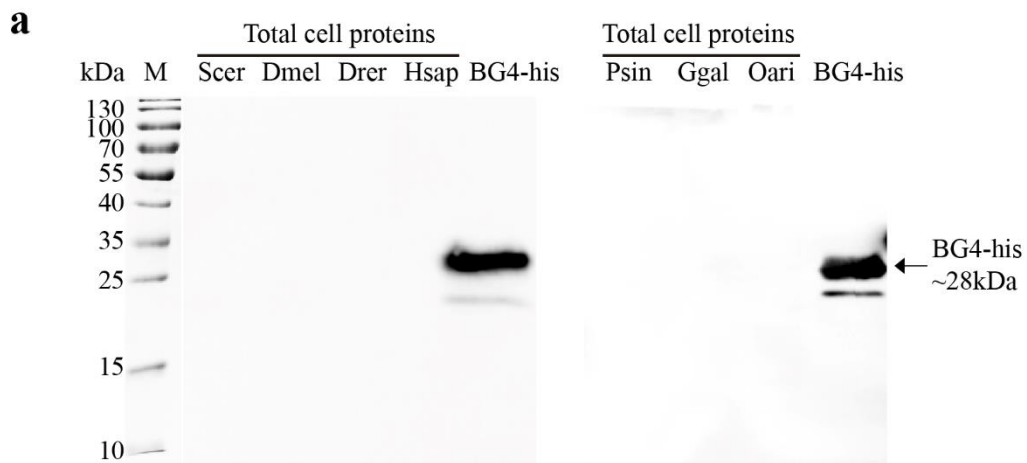

**Supplementary Fig. 2** Western blot analyses confirming that the anti-His antibody could specifically recognize BG4-His but could not recognize other proteins in the cells.

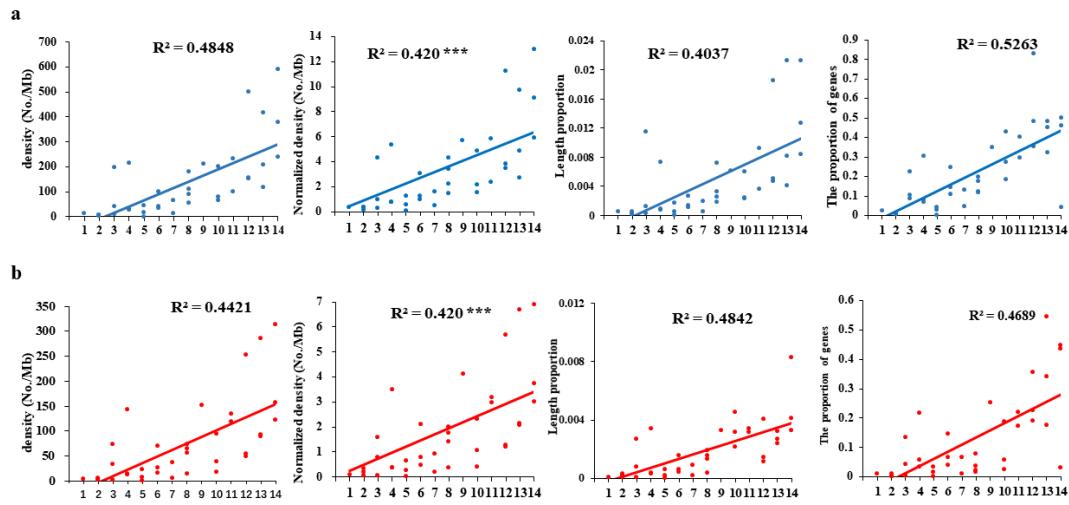

**Supplementary Fig 3.** Genomic landscape (density, normalized density, length ratio of motifs in the genomes, and the proportion of the genes bearing the motifs in the upstream 2 kb region) of  $(G/C)_3L_{1-12}$  (a) and  $G/C_3L_{1-7}$  (b) motifs in the 37 species. R2: goodness of fit of the trend lines. \*,  $p < 0.05$ ; \*\*,  $p < 0.01$ ; and \*\*\*,  $p < 0.001$  by F test.  $n = 37$  biologically independent samples.

**Supplementary Table 1** Genome information and statistics of G4 motifs in the genomes of the 37 species

| Category        | Species                         | Genome size(bp) | GC content(%) | No. Genes | G4 count | Normalized G4 count | G4 Density(No./Mb) | Normalized G4 density(No./Mb) | Total G4 length | (G/C) <sub>3</sub> L <sub>1-7</sub> count | Normalized (G/C) <sub>3</sub> L <sub>1-7</sub> count | (G/C) <sub>3</sub> L <sub>1-7</sub> density | Normalized (G/C) <sub>3</sub> L <sub>1-7</sub> density | Total (G/C) <sub>3</sub> L <sub>1-7</sub> length | (G/C) <sub>3</sub> L <sub>1-12</sub> count | Normalized (G/C) <sub>3</sub> L <sub>1-12</sub> count | (G/C) <sub>3</sub> L <sub>1-12</sub> density | Normalized (G/C) <sub>3</sub> L <sub>1-12</sub> density | Total (G/C) <sub>3</sub> L <sub>1-12</sub> length |
|-----------------|---------------------------------|-----------------|---------------|-----------|----------|---------------------|--------------------|-------------------------------|-----------------|-------------------------------------------|------------------------------------------------------|---------------------------------------------|--------------------------------------------------------|--------------------------------------------------|--------------------------------------------|-------------------------------------------------------|----------------------------------------------|---------------------------------------------------------|---------------------------------------------------|
| Fungi           | <i>Saccharomyces cerevisiae</i> | 12157105        | 38.148        | 6,692     | 4705     | 123.336             | 405.816            | 10.638                        | 83856           | 38                                        | 0.996                                                | 3.278                                       | 0.086                                                  | 956                                              | 143                                        | 3.749                                                 | 12.334                                       | 0.323                                                   | 6178                                              |
| Protozoa        | <i>Plasmodium reichenowi</i>    | 24055504        | 19.258        | 5,630     | 2400     | 124.623             | 104.616            | 5.432                         | 60949           | 144                                       | 7.477                                                | 6.277                                       | 0.326                                                  | 6779                                             | 166                                        | 8.620                                                 | 7.236                                        | 0.376                                                   | 13574                                             |
|                 | <i>Paramecium tetraurelia</i>   | 72094543        | 28.051        | 39,642    | 8527     | 303.979             | 124.021            | 4.421                         | 173563          | 139                                       | 4.955                                                | 2.022                                       | 0.072                                                  | 12193                                            | 293                                        | 10.445                                                | 4.262                                        | 0.152                                                   | 17600                                             |
|                 | <i>Dictyostelium discoideum</i> | 34134454        | 22.432        | 13,243    | 12518    | 558.031             | 384.540            | 17.142                        | 225113          | 139                                       | 6.196                                                | 4.270                                       | 0.190                                                  | 3350                                             | 232                                        | 10.342                                                | 7.127                                        | 0.318                                                   | 6979                                              |
| Platyhelminthes | <i>Schistosoma mansoni</i>      | 364541798       | 35.208        | 7,544     | 68679    | 1950.661            | 197.550            | 5.611                         | 1202175         | 781                                       | 22.182                                               | 2.246                                       | 0.064                                                  | 21085                                            | 3762                                       | 106.851                                               | 10.821                                       | 0.307                                                   | 117326                                            |
|                 | <i>Macrostomum lignano</i>      | 536655498       | 46.093        | 49,027    | 1538682  | 33382.182           | 3006.445           | 65.226                        | 35865996        | 37477                                     | 813.075                                              | 73.227                                      | 1.589                                                  | 1443464                                          | 101002                                     | 2191.270                                              | 197.349                                      | 4.282                                                   | 6179448                                           |
|                 | <i>Echinococcus granulosus</i>  | 98695753        | 43.359        | 11,319    | 112264   | 2589.179            | 1192.729           | 27.508                        | 2012044         | 3198                                      | 73.756                                               | 33.977                                      | 0.784                                                  | 78597                                            | 4066                                       | 93.775                                                | 43.199                                       | 0.996                                                   | 128867                                            |
| Coelenterata    | <i>Nematostella vectensis</i>   | 356613585       | 40.635        | 24,808    | 462104   | 11372.027           | 1358.757           | 33.438                        | 10238516        | 48544                                     | 1194.631                                             | 142.737                                     | 3.513                                                  | 1211288                                          | 73884                                      | 1818.229                                              | 217.246                                      | 5.346                                                   | 2611698                                           |
|                 | <i>Acropora digitifera</i>      | 357255219       | 40.732        | 32,469    | 183885   | 4514.563            | 539.719            | 13.251                        | 3429280         | 5199                                      | 127.641                                              | 15.260                                      | 0.375                                                  | 132716                                           | 10484                                      | 257.393                                               | 30.771                                       | 0.755                                                   | 338783                                            |
|                 | <i>Hydra vulgaris</i>           | 454579533       | 34.439        | 22,980    | 207130   | 6014.425            | 477.786            | 13.873                        | 3623462         | 5428                                      | 157.613                                              | 12.521                                      | 0.364                                                  | 134913                                           | 11547                                      | 335.290                                               | 26.635                                       | 0.773                                                   | 378936                                            |
| Nematoda        | <i>Caenorhabditis elegans</i>   | 100286401       | 35.440        | 35,827    | 60994    | 1721.062            | 637.742            | 17.995                        | 1211504         | 2227                                      | 62.839                                               | 23.285                                      | 0.657                                                  | 57917                                            | 4291                                       | 121.079                                               | 44.866                                       | 1.266                                                   | 177685                                            |
|                 | <i>Strongyloides ratti</i>      | 43150242        | 21.427        | 12,449    | 3518     | 164.183             | 85.489             | 3.990                         | 63476           | 17                                        | 0.793                                                | 0.413                                       | 0.019                                                  | 564                                              | 39                                         | 1.820                                                 | 0.948                                        | 0.044                                                   | 1769                                              |
|                 | <i>Brugia malayi</i>            | 94062919        | 29.587        | 13,571    | 16321    | 551.636             | 181.940            | 6.149                         | 330960          | 699                                       | 23.626                                               | 7.792                                       | 0.263                                                  | 19455                                            | 1407                                       | 47.555                                                | 15.685                                       | 0.530                                                   | 49866                                             |

|               |                                      |            |        |        |         |            |          |        |           |        |           |         |       |         |         |           |         |        |          |
|---------------|--------------------------------------|------------|--------|--------|---------|------------|----------|--------|-----------|--------|-----------|---------|-------|---------|---------|-----------|---------|--------|----------|
| Mollusca      | <i>Lottia gigantea</i>               | 359505668  | 33.279 | 23,361 | 120565  | 3622.858   | 351.654  | 10.567 | 2431111   | 9120   | 274.047   | 26.600  | 0.799 | 228368  | 14386   | 432.285   | 41.960  | 1.261  | 475742   |
|               | <i>Octopus bimaculoides</i>          | 2338188782 | 36.041 | 33,610 | 1599129 | 44370.285  | 717.140  | 19.898 | 30293985  | 37392  | 1037.498  | 16.769  | 0.465 | 994826  | 76099   | 2111.483  | 34.127  | 0.947  | 2725830  |
|               | <i>Crassostrea gigas</i>             | 557717710  | 33.425 | 26,104 | 383419  | 11471.083  | 720.874  | 21.567 | 7253782   | 37679  | 1127.276  | 70.841  | 2.119 | 868336  | 54490   | 1630.225  | 102.448 | 3.065  | 1486402  |
| Annelida      | <i>Capitella teleta</i>              | 333283208  | 40.358 | 32,192 | 224940  | 5573.596   | 707.706  | 17.536 | 4270435   | 11947  | 296.024   | 37.588  | 0.931 | 295211  | 20648   | 511.619   | 64.963  | 1.610  | 659899   |
|               | <i>Helobdella robusta</i>            | 235376169  | 32.820 | 23,434 | 123770  | 3771.139   | 551.382  | 16.800 | 2615233   | 1493   | 45.490    | 6.651   | 0.203 | 47373   | 3392    | 103.351   | 15.111  | 0.460  | 131168   |
| Arthropoda    | <i>Apis mellifera</i>                | 250270657  | 32.696 | 13,287 | 275908  | 8438.524   | 1155.991 | 35.355 | 5456071   | 15503  | 474.152   | 64.954  | 1.987 | 384884  | 26538   | 811.653   | 111.188 | 3.401  | 825000   |
|               | <i>Bombyx mori</i>                   | 453421119  | 38.317 | 14,623 | 411423  | 10737.431  | 951.452  | 24.831 | 6959101   | 6278   | 163.845   | 14.518  | 0.379 | 174338  | 23769   | 620.330   | 54.968  | 1.435  | 859614   |
|               | <i>Drosophila melanogaster</i>       | 143726002  | 42.006 | 14,151 | 209804  | 4994.598   | 1530.659 | 36.439 | 4528697   | 10182  | 242.393   | 74.284  | 1.768 | 277585  | 24814   | 590.723   | 181.034 | 4.310  | 1037348  |
|               | <i>Danaus pulex</i>                  | 197206209  | 40.765 | 30,590 | 200618  | 4921.339   | 1066.717 | 26.168 | 577360    | 10728  | 263.167   | 57.042  | 1.399 | 255441  | 17007   | 417.197   | 90.429  | 2.218  | 515060   |
| Echinodermata | <i>Strongylocentrotus purpuratus</i> | 936564995  | 37.012 | 29,057 | 1323932 | 35769.958  | 1482.271 | 40.048 | 26639899  | 136075 | 3676.471  | 152.349 | 4.116 | 3053674 | 189456  | 5118.717  | 212.114 | 5.731  | 5700458  |
| Fish          | <i>Latimeria chalumnae</i>           | 2860591921 | 41.151 | 19,569 | 4674336 | 113589.852 | 1713.420 | 41.637 | 20663376  | 258792 | 6288.847  | 94.863  | 2.305 | 6193097 | 546547  | 13281.518 | 200.342 | 4.868  | 17225062 |
|               | <i>Branchiostoma floridae</i>        | 402213743  | 42.099 | 28,627 | 161412  | 3834.061   | 420.803  | 9.995  | 19179329  | 6678   | 158.624   | 17.410  | 0.414 | 1266308 | 25228   | 599.247   | 65.770  | 1.562  | 916002   |
|               | <i>Danio rerio</i>                   | 1371719383 | 36.640 | 26,801 | 1061780 | 28978.704  | 811.651  | 22.152 | 70742161  | 50974  | 1391.211  | 38.966  | 1.063 | 6191298 | 103259  | 2818.203  | 78.934  | 2.154  | 3353374  |
| Amphibian     | <i>Xenopus tropicalis</i>            | 1511735326 | 40.063 | 18,496 | 1907074 | 47601.302  | 1322.792 | 33.017 | 43271594  | 171278 | 4275.165  | 118.803 | 2.965 | 4822597 | 335441  | 8372.737  | 232.670 | 5.808  | 14000561 |
|               | <i>Nanorana parkeri</i>              | 1297236036 | 42.422 | 21,416 | 3209691 | 75660.612  | 2594.443 | 61.158 | 58731184  | 167281 | 3943.240  | 135.216 | 3.187 | 4393760 | 123420  | 2909.325  | 99.762  | 2.352  | 4746960  |
| Reptilia      | <i>Anolis carolinensis</i>           | 1799143587 | 40.319 | 9,086  | 1598056 | 39635.108  | 931.378  | 23.100 | 32018066  | 83641  | 2074.471  | 48.748  | 1.209 | 2019034 | 265830  | 6593.136  | 154.931 | 3.843  | 8477996  |
|               | <i>Pelodiscus sinensis</i>           | 2202483752 | 44.410 | 18,189 | 4494044 | 101194.416 | 2139.560 | 48.178 | 105659088 | 530115 | 11936.953 | 252.381 | 5.683 | 8890451 | 1049290 | 23627.562 | 499.554 | 11.249 | 40741489 |

|          |                                 |            |        |        |         |            |          |        |           |        |           |         |       |          |         |           |         |        |          |
|----------|---------------------------------|------------|--------|--------|---------|------------|----------|--------|-----------|--------|-----------|---------|-------|----------|---------|-----------|---------|--------|----------|
|          | <i>Alligator sinensis</i>       | 1619988496 | 43.260 | 22,381 | 4994172 | 115445.492 | 3232.596 | 74.724 | 96083248  | 85233  | 1970.229  | 55.169  | 1.275 | 2309308  | 233853  | 5405.698  | 151.367 | 3.499  | 8231961  |
| Aves     | <i>Gallus gallus</i>            | 1230258557 | 42.850 | 15,589 | 3107195 | 72513.753  | 2648.330 | 61.805 | 62966332  | 336212 | 7846.303  | 286.561 | 6.688 | 3951627  | 487757  | 11382.965 | 415.726 | 9.702  | 26148201 |
|          | <i>Pseudopodoces humilis</i>    | 844939770  | 43.127 | 16,586 | 1061678 | 24617.207  | 1317.550 | 30.550 | 24573536  | 72055  | 1670.745  | 89.421  | 2.073 | 2266233  | 169186  | 3922.928  | 209.961 | 4.868  | 6855902  |
|          | <i>Struthio camelus</i>         | 1011267964 | 43.120 | 16,646 | 1057265 | 24519.043  | 1096.270 | 25.424 | 27887498  | 89060  | 2065.391  | 92.346  | 2.142 | 2406508  | 112816  | 2616.317  | 116.978 | 2.713  | 4151884  |
| Mammalia | <i>Ornithorhynchus anatinus</i> | 2073148626 | 45.499 | 33,610 | 2110195 | 46378.734  | 1067.314 | 23.458 | 64103134  | 619883 | 13624.044 | 313.530 | 6.891 | 17188827 | 1165798 | 25622.388 | 589.648 | 12.960 | 44161831 |
|          | <i>Ovis aries</i>               | 2619054388 | 41.829 | 20,195 | 5532861 | 132273.327 | 2215.160 | 52.957 | 121674387 | 391424 | 9357.624  | 156.712 | 3.746 | 10737494 | 948705  | 22680.329 | 379.828 | 9.080  | 33233821 |
|          | <i>Homo sapiens</i>             | 3099750720 | 40.863 | 20,449 | 7356494 | 180028.241 | 2488.537 | 60.899 | 146013944 | 362817 | 8878.854  | 122.733 | 3.004 | 10142187 | 711650  | 17415.493 | 240.735 | 5.891  | 26023695 |

**Supplementary Table 2** Enrichment of the (G/C)<sub>3</sub>L<sub>1-7</sub> G4 motif-bearing genes in the function of transcription factor activity in 19 representative species

| Phylogenetic group | Species                                                                        | GO ID      | Description                                                                                              | Genes      | P value                                                     | Corrected p value |
|--------------------|--------------------------------------------------------------------------------|------------|----------------------------------------------------------------------------------------------------------|------------|-------------------------------------------------------------|-------------------|
| Fungi              | <i>Saccharomyces cerevisiae</i>                                                | GO:0000982 | Transcription factor activity, RNA polymerase II core promoter proximal region sequence-specific binding | 1          | 0.2332                                                      | 0.3887            |
|                    |                                                                                | GO:0003700 | Transcription factor activity, sequence-specific DNA binding                                             | 2          | 0.3611                                                      | 0.5015            |
| Protozoa           | <i>Dictyostelium discoideum</i>                                                | GO:0003700 | Transcription factor activity, sequence-specific DNA binding                                             | 2          | 0.1909                                                      | 0.3858            |
| Platyhelminthes    | <i>Schistosoma mansoni</i>                                                     | GO:0000981 | RNA polymerase II transcription factor activity, sequence-specific DNA binding                           | 1          | 0.2296                                                      | 0.6561            |
| Coelenterata       | <i>Nematostella vectensis</i>                                                  | GO:0000991 | Transcription factor activity, core RNA polymerase II binding                                            | 1          | 0.2235                                                      | 0.6667            |
|                    |                                                                                | GO:0000982 | Transcription factor activity, RNA polymerase II core promoter proximal region sequence-specific binding | 4          | 0.4404                                                      | 0.8171            |
|                    |                                                                                | GO:0004879 | RNA polymerase II transcription factor activity, ligand-activated sequence-specific DNA binding          | 1          | 0.8974                                                      | 0.9844            |
|                    |                                                                                | GO:0000981 | RNA polymerase II transcription factor activity, sequence-specific DNA binding                           | 21         | 0.9064                                                      | 0.9874            |
|                    |                                                                                | GO:0001076 | Transcription factor activity, RNA polymerase II transcription factor binding                            | 4          | 0.9153                                                      | 0.9880            |
|                    |                                                                                | GO:0001071 | Nucleic acid binding transcription factor activity                                                       | 59         | 0.9441                                                      | 0.9939            |
|                    |                                                                                | GO:0003700 | Transcription factor activity, sequence-specific DNA binding                                             | 59         | 0.9441                                                      | 0.9939            |
|                    |                                                                                | GO:0000988 | Transcription factor activity, protein binding                                                           | 13         | 0.9500                                                      | 0.9939            |
|                    |                                                                                | GO:0000989 | Transcription factor activity, transcription factor binding                                              | 12         | 0.9664                                                      | 0.9992            |
|                    |                                                                                | Nematoda   | <i>Caenorhabditis elegans</i>                                                                            | GO:0000989 | Transcription factor activity, transcription factor binding | 4                 |
| GO:0000988         | Transcription factor activity, protein binding                                 |            |                                                                                                          | 4          | 0.3916                                                      | 0.7117            |
| GO:0001071         | Nucleic acid binding transcription factor activity                             |            |                                                                                                          | 17         | 0.7549                                                      | 0.8965            |
| GO:0003700         | Transcription factor activity, sequence-specific DNA binding                   |            |                                                                                                          | 17         | 0.7549                                                      | 0.8965            |
| GO:0000981         | RNA polymerase II transcription factor activity, sequence-specific DNA binding |            |                                                                                                          | 3          | 0.8135                                                      | 0.9163            |
| Nematoda           | <i>Brugia malayi</i>                                                           | GO:0003700 | Transcription factor activity, sequence-specific DNA binding                                             | 5          | 0.1349                                                      | 0.3654            |
| Mollusca           | <i>Lottia gigantea</i>                                                         | GO:0000988 | Transcription factor activity, protein binding                                                           | 4          | 0.2947                                                      | 0.5849            |

|                   |                                  |                   |                                                                                                      |           |               |               |
|-------------------|----------------------------------|-------------------|------------------------------------------------------------------------------------------------------|-----------|---------------|---------------|
|                   |                                  | GO:0000989        | Transcription factor activity, transcription factor binding                                          | 4         | 0.2947        | 0.5849        |
|                   |                                  | GO:0001076        | Transcription factor activity, RNA polymerase II transcription factor binding                        | 1         | 0.7228        | 0.8462        |
|                   |                                  | GO:0001071        | Nucleic acid binding transcription factor activity                                                   | 5         | 0.9988        | 1.0000        |
|                   |                                  | GO:0003700        | Transcription factor activity, sequence-specific DNA binding                                         | 5         | 0.9988        | 1.0000        |
| <b>Mollusca</b>   | <b><i>Crassostrea gigas</i></b>  |                   |                                                                                                      |           |               |               |
|                   |                                  | GO:0001026        | TFIIIB-type transcription factor activity                                                            | 1         | 0.2749        | 0.6370        |
|                   |                                  | GO:0000989        | Transcription factor activity, transcription factor binding                                          | 11        | 0.6224        | 0.8232        |
|                   |                                  | GO:0001076        | Transcription factor activity, RNA polymerase II transcription factor binding                        | 3         | 0.7399        | 0.8868        |
|                   |                                  | GO:0004879        | RNA polymerase II transcription factor activity, ligand-activated sequence-specific DNA binding      | 1         | 0.7997        | 0.9114        |
|                   |                                  | GO:0003700        | Transcription factor activity, sequence-specific DNA binding                                         | 23        | 0.9900        | 0.9932        |
| <b>Annelida</b>   | <b><i>Capitella teleta</i></b>   |                   |                                                                                                      |           |               |               |
|                   |                                  | GO:0001071        | Nucleic acid binding transcription factor activity                                                   | 30        | 0.0054        | 0.3546        |
|                   |                                  | GO:0003700        | Transcription factor activity, sequence-specific DNA binding                                         | 30        | 0.0054        | 0.3546        |
|                   |                                  | GO:0000981        | RNA polymerase II transcription factor activity, sequence-specific DNA binding                       | 5         | 0.0074        | 0.3700        |
|                   |                                  | GO:0004879        | RNA polymerase II transcription factor activity, ligand-activated sequence-specific DNA binding      | 4         | 0.0082        | 0.3700        |
|                   |                                  | GO:0098531        | Transcription factor activity, direct ligand regulated sequence-specific DNA binding                 | 4         | 0.0082        | 0.3700        |
|                   |                                  | GO:0001187        | Transcription factor activity, RNA polymerase I CORE element binding transcription factor recruiting | 1         | 0.0718        | 0.5055        |
|                   |                                  | GO:0000989        | Transcription factor activity, transcription factor binding                                          | 3         | 0.6362        | 0.8477        |
| <b>Annelida</b>   | <b><i>Helobdella robusta</i></b> |                   |                                                                                                      |           |               |               |
|                   |                                  | GO:0003700        | Transcription factor activity, sequence-specific DNA binding                                         | 6         | 0.0977        | 0.5975        |
| <b>Arthropoda</b> | <b><i>Apis mellifera</i></b>     |                   |                                                                                                      |           |               |               |
|                   |                                  | <b>GO:0001071</b> | <b>Nucleic acid binding transcription factor activity</b>                                            | <b>27</b> | <b>0.0000</b> | <b>0.0000</b> |
|                   |                                  | <b>GO:0003700</b> | <b>Transcription factor activity, sequence-specific DNA binding</b>                                  | <b>27</b> | <b>0.0000</b> | <b>0.0000</b> |
|                   |                                  | GO:0000981        | RNA polymerase II transcription factor activity, sequence-specific DNA binding                       | 3         | 0.0135        | 0.1185        |
|                   |                                  | GO:0004879        | RNA polymerase II transcription factor activity, ligand-activated sequence-specific DNA binding      | 1         | 0.2685        | 0.5885        |
|                   |                                  | GO:0000989        | Transcription factor activity, transcription factor binding                                          | 1         | 0.8092        | 1.0000        |
| <b>Arthropoda</b> | <b><i>Bombyx mori</i></b>        |                   |                                                                                                      |           |               |               |
|                   |                                  | GO:0001071        | Nucleic acid binding transcription factor activity                                                   | 10        | 0.0083        | 0.2479        |



|                      |                                      |                   |                                                                                                                                     |            |               |               |
|----------------------|--------------------------------------|-------------------|-------------------------------------------------------------------------------------------------------------------------------------|------------|---------------|---------------|
|                      |                                      | GO:0003700        | Transcription factor activity, sequence-specific DNA binding                                                                        | 10         | 0.0083        | 0.2479        |
| <b>Arthropoda</b>    | <i>Drosophila melanogaster</i>       |                   |                                                                                                                                     |            |               |               |
|                      |                                      | <b>GO:0001071</b> | <b>Nucleic acid binding transcription factor activity</b>                                                                           | <b>70</b>  | <b>0.0000</b> | <b>0.0000</b> |
|                      |                                      | GO:0000988        | Protein binding transcription factor activity                                                                                       | 9          | 0.6682        | 1.0000        |
| <b>Echinodermata</b> | <i>Strongylocentrotus purpuratus</i> |                   |                                                                                                                                     |            |               |               |
|                      |                                      | GO:0001075        | Transcription factor activity, RNA polymerase II core promoter sequence-specific binding involved in preinitiation complex assembly | 2          | 0.0653        | 0.6149        |
|                      |                                      | GO:0000991        | Transcription factor activity, core RNA polymerase II binding                                                                       | 1          | 0.2556        | 0.7064        |
|                      |                                      | GO:0001076        | Transcription factor activity, RNA polymerase II transcription factor binding                                                       | 11         | 0.4485        | 0.7935        |
|                      |                                      | GO:0000982        | Transcription factor activity, RNA polymerase II core promoter proximal region sequence-specific binding                            | 5          | 0.5035        | 0.8358        |
|                      |                                      | GO:0000988        | Transcription factor activity, protein binding                                                                                      | 30         | 0.5275        | 0.8583        |
|                      |                                      | GO:0000989        | Transcription factor activity, transcription factor binding                                                                         | 29         | 0.5906        | 0.8610        |
|                      |                                      | GO:0000981        | RNA polymerase II transcription factor activity, sequence-specific DNA binding                                                      | 38         | 0.6813        | 0.8984        |
|                      |                                      | GO:0001083        | Transcription factor activity, RNA polymerase II basal transcription factor binding                                                 | 1          | 0.6930        | 0.8984        |
|                      |                                      | GO:0001129        | RNA polymerase II transcription factor activity, TBP-class protein binding, involved in preinitiation complex assembly              | 1          | 0.6930        | 0.8984        |
|                      |                                      | GO:0001132        | RNA polymerase II transcription factor activity, TBP-class protein binding                                                          | 1          | 0.6930        | 0.8984        |
|                      |                                      | GO:0001071        | Nucleic acid binding transcription factor activity                                                                                  | 98         | 0.6962        | 0.9001        |
|                      |                                      | GO:0003700        | Transcription factor activity, sequence-specific DNA binding                                                                        | 98         | 0.6962        | 0.9001        |
|                      |                                      | GO:0004879        | RNA polymerase II transcription factor activity, ligand-activated sequence-specific DNA binding                                     | 2          | 0.9786        | 1.0000        |
|                      |                                      | GO:0098531        | Transcription factor activity, direct ligand regulated sequence-specific DNA binding                                                | 2          | 0.9786        | 1.0000        |
| <b>Fish</b>          | <i>Danio rerio</i>                   |                   |                                                                                                                                     |            |               |               |
|                      |                                      | GO:0001071        | Nucleic acid binding transcription factor activity                                                                                  | 47         | 0.1072        | 0.8044        |
|                      |                                      | GO:0000988        | Protein binding transcription factor activity                                                                                       | 9          | 0.6281        | 1.0000        |
| <b>Amphibian</b>     | <i>Xenopus tropicalis</i>            |                   |                                                                                                                                     |            |               |               |
|                      |                                      | <b>GO:0001071</b> | <b>Nucleic acid binding transcription factor activity</b>                                                                           | <b>182</b> | <b>0.0000</b> | <b>0.0013</b> |
|                      |                                      | <b>GO:0003700</b> | <b>Transcription factor activity, sequence-specific DNA binding</b>                                                                 | <b>182</b> | <b>0.0000</b> | <b>0.0013</b> |
|                      |                                      | GO:0000981        | RNA polymerase II transcription factor activity, sequence-specific DNA binding                                                      | 80         | 0.0001        | 0.0552        |
|                      |                                      | GO:0004879        | RNA polymerase II transcription factor activity, ligand-activated sequence-specific DNA binding                                     | 12         | 0.0220        | 0.6872        |

|                 |                             |                   |                                                                                                                                     |            |               |               |
|-----------------|-----------------------------|-------------------|-------------------------------------------------------------------------------------------------------------------------------------|------------|---------------|---------------|
|                 |                             | GO:0098531        | Transcription factor activity, direct ligand regulated sequence-specific DNA binding                                                | 12         | 0.0220        | 0.6872        |
|                 |                             | GO:0000982        | Transcription factor activity, RNA polymerase II core promoter proximal region sequence-specific binding                            | 15         | 0.0403        | 0.6872        |
|                 |                             | GO:0000983        | Transcription factor activity, RNA polymerase II core promoter sequence-specific                                                    | 4          | 0.0481        | 0.6872        |
|                 |                             | GO:0001075        | Transcription factor activity, RNA polymerase II core promoter sequence-specific binding involved in preinitiation complex assembly | 4          | 0.0481        | 0.6872        |
|                 |                             | GO:0003705        | Transcription factor activity, RNA polymerase II distal enhancer sequence-specific binding                                          | 2          | 0.4852        | 0.7988        |
|                 |                             | GO:0000989        | Transcription factor activity, transcription factor binding                                                                         | 33         | 0.6795        | 0.8742        |
|                 |                             | GO:0000988        | Transcription factor activity, protein binding                                                                                      | 33         | 0.7090        | 0.8742        |
|                 |                             | GO:0001076        | transcription factor activity, RNA polymerase II transcription factor binding                                                       | 3          | 0.9983        | 1.0000        |
| <b>Aves</b>     | <b><i>Gallus gallus</i></b> |                   |                                                                                                                                     |            |               |               |
|                 |                             | GO:0000988        | Protein binding transcription factor activity                                                                                       | 121        | 0.2329        | 0.5060        |
|                 |                             | GO:0001071        | Nucleic acid binding transcription factor activity                                                                                  | 233        | 0.4673        | 0.7181        |
| <b>Mammalia</b> | <b><i>Ovis aries</i></b>    |                   |                                                                                                                                     |            |               |               |
|                 |                             | <b>GO:0001071</b> | <b>Nucleic acid binding transcription factor activity</b>                                                                           | <b>394</b> | <b>0.0000</b> | <b>0.0000</b> |
|                 |                             | <b>GO:0003700</b> | <b>Transcription factor activity, sequence-specific DNA binding</b>                                                                 | <b>394</b> | <b>0.0000</b> | <b>0.0000</b> |
|                 |                             | <b>GO:0000981</b> | <b>RNA polymerase II transcription factor activity, sequence-specific DNA binding</b>                                               | <b>230</b> | <b>0.0000</b> | <b>0.0000</b> |
|                 |                             | <b>GO:0000982</b> | <b>Transcription factor activity, RNA polymerase II core promoter proximal region sequence-specific binding</b>                     | <b>145</b> | <b>0.0000</b> | <b>0.0000</b> |
|                 |                             | GO:0003705        | Transcription factor activity, RNA polymerase II distal enhancer sequence-specific binding                                          | 34         | 0.0036        | 0.1441        |
|                 |                             | GO:0001076        | Transcription factor activity, RNA polymerase II transcription factor binding                                                       | 55         | 0.0042        | 0.1583        |
|                 |                             | GO:0000988        | Transcription factor activity, protein binding                                                                                      | 160        | 0.0066        | 0.2095        |
|                 |                             | GO:0000989        | Transcription factor activity, transcription factor binding                                                                         | 157        | 0.0108        | 0.2848        |
|                 |                             | GO:0004879        | RNA polymerase II transcription factor activity, ligand-activated sequence-specific DNA binding                                     | 18         | 0.1558        | 0.7389        |
|                 |                             | GO:0098531        | Transcription factor activity, direct ligand regulated sequence-specific DNA binding                                                | 18         | 0.1558        | 0.7389        |
|                 |                             | GO:0000983        | Transcription factor activity, RNA polymerase II core promoter sequence-specific                                                    | 6          | 0.3138        | 0.7389        |
|                 |                             | GO:0001134        | Transcription factor activity, transcription factor recruiting                                                                      | 2          | 0.3941        | 0.7389        |
|                 |                             | GO:0001010        | Transcription factor activity, sequence-specific DNA binding transcription factor recruiting                                        | 1          | 0.4289        | 0.7389        |
|                 |                             | GO:0001087        | Transcription factor activity, TFIIB-class binding                                                                                  | 1          | 0.4289        | 0.7389        |

|            |                                                                                                       |   |        |        |
|------------|-------------------------------------------------------------------------------------------------------|---|--------|--------|
| GO:0001135 | Transcription factor activity, RNA polymerase II transcription factor recruiting                      | 1 | 0.4289 | 0.7389 |
| GO:0038051 | Glucocorticoid-activated RNA polymerase II transcription factor binding transcription factor activity | 1 | 0.4289 | 0.7389 |
| GO:0038052 | RNA polymerase II transcription factor activity, estrogen-activated sequence-specific DNA binding     | 1 | 0.6739 | 0.8616 |

**Mammalia**      *Homo sapiens*

|                   |                                                           |            |               |               |
|-------------------|-----------------------------------------------------------|------------|---------------|---------------|
| <b>GO:0001071</b> | <b>Nucleic acid binding transcription factor activity</b> | <b>666</b> | <b>0.0000</b> | <b>0.0000</b> |
| <b>GO:0000988</b> | <b>Protein binding transcription factor activity</b>      | <b>332</b> | <b>0.0000</b> | <b>0.0000</b> |

---

**Supplementary Table 3** The (G/C)<sub>3</sub>L<sub>1-7</sub> motif in the upstream 2kb of pair-wise orthologous genes

| Group              | No. orthologs | No.(G/C) <sub>3</sub> L <sub>1-7</sub> in upstream 2kb | No. Genes bearing (G/C) <sub>3</sub> L <sub>1-7</sub> in upstream 2kb |
|--------------------|---------------|--------------------------------------------------------|-----------------------------------------------------------------------|
| <i>D.mel-S.cer</i> | 2008          | 2                                                      | 2                                                                     |
| <i>D.mel-P.rei</i> | 1467          | 0                                                      | 0                                                                     |
| <i>D.mel-S.man</i> | 3972          | 11                                                     | 11                                                                    |
| <i>D.mel-N.vec</i> | 5072          | 1903                                                   | 1438                                                                  |
| <i>D.mel-C.ele</i> | 4467          | 158                                                    | 150                                                                   |
| <i>D.mel-L.gig</i> | 5784          | 472                                                    | 416                                                                   |
| <i>D.mel-C.tel</i> | 5871          | 611                                                    | 542                                                                   |
| <i>D.mel-S.pur</i> | 5469          | 2024                                                   | 1529                                                                  |
| <i>D.mel-D.rer</i> | 5795          | 337                                                    | 296                                                                   |
| <i>D.mel-X.tro</i> | 5547          | 2229                                                   | 1307                                                                  |
| <i>D.mel-Acar</i>  | 5464          | 2539                                                   | 1995                                                                  |
| <i>D.mel-G.gal</i> | 5450          | 7815                                                   | 3103                                                                  |
| <i>D.mel-H.sap</i> | 5754          | 5442                                                   | 2765                                                                  |

**Supplementary Table 4** The links to download genome information of the species used in this study

| <b>Category</b> | <b>Species</b>                  | <b>Links to genome data</b>                                                                                                                                         |
|-----------------|---------------------------------|---------------------------------------------------------------------------------------------------------------------------------------------------------------------|
| Fungi           | <i>Saccharomyces cerevisiae</i> | <a href="http://fungi.ensembl.org/Saccharomyces_cerevisiae/Info/Index">http://fungi.ensembl.org/Saccharomyces_cerevisiae/Info/Index</a>                             |
| Protozoa        | <i>Plasmodium reichenowi</i>    | <a href="http://protists.ensembl.org/Plasmodium_reichenowi_gca_001601855/Info/Index">http://protists.ensembl.org/Plasmodium_reichenowi_gca_001601855/Info/Index</a> |
|                 | <i>Paramecium tetraurelia</i>   | <a href="http://protists.ensembl.org/Paramecium_tetraurelia/Info/Index">http://protists.ensembl.org/Paramecium_tetraurelia/Info/Index</a>                           |
|                 | <i>Dictyostelium discoideum</i> | <a href="http://protists.ensembl.org/Dictyostelium_discoideum/Info/Index">http://protists.ensembl.org/Dictyostelium_discoideum/Info/Index</a>                       |
| Platyhelminthes | <i>Schistosoma mansoni</i>      | <a href="http://metazoa.ensembl.org/Schistosoma_mansoni/Info/Index">http://metazoa.ensembl.org/Schistosoma_mansoni/Info/Index</a>                                   |
|                 | <i>Macrostomum lignano</i>      | <a href="https://www.ncbi.nlm.nih.gov/genome/?term=Macrostomum_lignano">https://www.ncbi.nlm.nih.gov/genome/?term=Macrostomum_lignano</a>                           |
|                 | <i>Echinococcus granulosus</i>  | <a href="https://www.ncbi.nlm.nih.gov/genome/?term=Echinococcus_granulosus">https://www.ncbi.nlm.nih.gov/genome/?term=Echinococcus_granulosus</a>                   |
| Coelenterata    | <i>Nematostella vectensis</i>   | <a href="http://metazoa.ensembl.org/Nematostella_vectensis/Info/Index">http://metazoa.ensembl.org/Nematostella_vectensis/Info/Index</a>                             |
|                 | <i>Acropora digitifera</i>      | <a href="https://www.ncbi.nlm.nih.gov/genome/?term=Acropora_digitifera">https://www.ncbi.nlm.nih.gov/genome/?term=Acropora_digitifera</a>                           |
|                 | <i>Hydra vulgaris</i>           | <a href="https://www.ncbi.nlm.nih.gov/genome/?term=Hydra_vulgaris">https://www.ncbi.nlm.nih.gov/genome/?term=Hydra_vulgaris</a>                                     |
| Nematoda        | <i>Caenorhabditis elegans</i>   | <a href="http://metazoa.ensembl.org/Caenorhabditis_elegans/Info/Index">http://metazoa.ensembl.org/Caenorhabditis_elegans/Info/Index</a>                             |
|                 | <i>Strongyloides ratti</i>      | <a href="http://metazoa.ensembl.org/Strongyloides_ratti/Info/Index">http://metazoa.ensembl.org/Strongyloides_ratti/Info/Index</a>                                   |
|                 | <i>Brugia malayi</i>            | <a href="http://metazoa.ensembl.org/Brugia_malayi/Info/Index">http://metazoa.ensembl.org/Brugia_malayi/Info/Index</a>                                               |
| Mollusca        | <i>Lottia gigantea</i>          | <a href="http://metazoa.ensembl.org/Lottia_gigantea/Info/Index">http://metazoa.ensembl.org/Lottia_gigantea/Info/Index</a>                                           |
|                 | <i>Octopus bimaculoides</i>     | <a href="http://metazoa.ensembl.org/Octopus_bimaculoides/Info/Index">http://metazoa.ensembl.org/Octopus_bimaculoides/Info/Index</a>                                 |
|                 | <i>Crassostrea gigas</i>        | <a href="http://metazoa.ensembl.org/Crassostrea_gigas/Info/Index">http://metazoa.ensembl.org/Crassostrea_gigas/Info/Index</a>                                       |
| Annelida        | <i>Capitella teleta</i>         | <a href="http://metazoa.ensembl.org/Capitella_teleta/Info/Index">http://metazoa.ensembl.org/Capitella_teleta/Info/Index</a>                                         |
|                 | <i>Helobdella robusta</i>       | <a href="http://metazoa.ensembl.org/Helobdella_robusta/Info/Index">http://metazoa.ensembl.org/Helobdella_robusta/Info/Index</a>                                     |
| Arthropoda      | <i>Apis mellifera</i>           | <a href="http://metazoa.ensembl.org/Apis_mellifera/Info/Index">http://metazoa.ensembl.org/Apis_mellifera/Info/Index</a>                                             |
|                 | <i>Bombyx mori</i>              | <a href="https://silkgdb.bioinfotoolkits.net/base/download/-1">https://silkgdb.bioinfotoolkits.net/base/download/-1</a>                                             |
|                 | <i>Drosophila melanogaster</i>  | <a href="http://metazoa.ensembl.org/Drosophila_melanogaster/Info/Index">http://metazoa.ensembl.org/Drosophila_melanogaster/Info/Index</a>                           |
|                 | <i>Danaus plexippus</i>         | <a href="http://metazoa.ensembl.org/Danaus_plexippus/Info/Index">http://metazoa.ensembl.org/Danaus_plexippus/Info/Index</a>                                         |

|               |                                      |                                                                                                                                                       |
|---------------|--------------------------------------|-------------------------------------------------------------------------------------------------------------------------------------------------------|
| Echinodermata | <i>Strongylocentrotus purpuratus</i> | <a href="http://metazoa.ensembl.org/Strongylocentrotus_purpuratus/Info/Index">http://metazoa.ensembl.org/Strongylocentrotus_purpuratus/Info/Index</a> |
| Fish          | <i>Latimeria chalumnae</i>           | <a href="http://asia.ensembl.org/Latimeria_chalumnae/Info/Index">http://asia.ensembl.org/Latimeria_chalumnae/Info/Index</a>                           |
|               | <i>Branchiostoma floridae</i>        | <a href="https://www.ncbi.nlm.nih.gov/genome/?term=Branchiostoma_floridae">https://www.ncbi.nlm.nih.gov/genome/?term=Branchiostoma_floridae</a>       |
|               | <i>Danio rerio</i>                   | <a href="http://asia.ensembl.org/Danio_rerio/Info/Index">http://asia.ensembl.org/Danio_rerio/Info/Index</a>                                           |
| Amphibian     | <i>Xenopus tropicalis</i>            | <a href="http://asia.ensembl.org/Xenopus_tropicalis/Info/Index">http://asia.ensembl.org/Xenopus_tropicalis/Info/Index</a>                             |
|               | <i>Nanorana parkeri</i>              | <a href="https://www.ncbi.nlm.nih.gov/genome/?term=Nanorana_parkeri">https://www.ncbi.nlm.nih.gov/genome/?term=Nanorana_parkeri</a>                   |
| Reptilia      | <i>Anolis carolinensis</i>           | <a href="http://asia.ensembl.org/Anolis_carolinensis/Info/Index">http://asia.ensembl.org/Anolis_carolinensis/Info/Index</a>                           |
|               | <i>Pelodiscus sinensis</i>           | <a href="http://asia.ensembl.org/Pelodiscus_sinensis/Info/Index">http://asia.ensembl.org/Pelodiscus_sinensis/Info/Index</a>                           |
|               | <i>Alligator sinensis</i>            | <a href="https://www.ncbi.nlm.nih.gov/genome/?term=Alligator_sinensis%5D">https://www.ncbi.nlm.nih.gov/genome/?term=Alligator_sinensis%5D</a>         |
| Aves          | <i>Gallus gallus</i>                 | <a href="http://asia.ensembl.org/Gallus_gallus/Info/Index">http://asia.ensembl.org/Gallus_gallus/Info/Index</a>                                       |
|               | <i>Pseudopodoces humilis</i>         | <a href="https://www.ncbi.nlm.nih.gov/genome/?term=Pseudopodoces_humilis">https://www.ncbi.nlm.nih.gov/genome/?term=Pseudopodoces_humilis</a>         |
|               | <i>Struthio camelus</i>              | <a href="https://www.ncbi.nlm.nih.gov/genome/?term=Struthio_camelus">https://www.ncbi.nlm.nih.gov/genome/?term=Struthio_camelus</a>                   |
| Mammalia      | <i>Ornithorhynchus anatinus</i>      | <a href="http://asia.ensembl.org/Ornithorhynchus_anatinus/Info/Index">http://asia.ensembl.org/Ornithorhynchus_anatinus/Info/Index</a>                 |
|               | <i>Ovis aries</i>                    | <a href="http://asia.ensembl.org/Ovis_aries/Info/Index">http://asia.ensembl.org/Ovis_aries/Info/Index</a>                                             |
|               | <i>Homo sapiens</i>                  | <a href="http://asia.ensembl.org/Homo_sapiens/Info/Index">http://asia.ensembl.org/Homo_sapiens/Info/Index</a>                                         |

---
