# Supplementary material for: Genome-wide analysis of DNA G-quadruplex motifs across 37 species provides insights into G4 evolution
Source: PubMed Central journal article supplement (PMC7822830; doi:10.1038/s42003-020-01643-4), 2021-01-22
Supplement: 42003_2020_1643_MOESM6_ESM.pdf [file 42003_2020_1643_MOESM6_ESM.pdf]

## Reporting Summary

Nature Research wishes to improve the reproducibility of the work that we publish. This form provides structure for consistency and transparency in reporting. For further information on Nature Research policies, see [Authors & Referees](#) and the [Editorial Policy Checklist](#).

### Statistics

For all statistical analyses, confirm that the following items are present in the figure legend, table legend, main text, or Methods section.

n/a Confirmed

- |                                     |                                     |                                                                                                                                                                                                                                                            |
|-------------------------------------|-------------------------------------|------------------------------------------------------------------------------------------------------------------------------------------------------------------------------------------------------------------------------------------------------------|
| <input type="checkbox"/>            | <input checked="" type="checkbox"/> | The exact sample size ( $n$ ) for each experimental group/condition, given as a discrete number and unit of measurement                                                                                                                                    |
| <input type="checkbox"/>            | <input checked="" type="checkbox"/> | A statement on whether measurements were taken from distinct samples or whether the same sample was measured repeatedly                                                                                                                                    |
| <input type="checkbox"/>            | <input checked="" type="checkbox"/> | The statistical test(s) used AND whether they are one- or two-sided<br><i>Only common tests should be described solely by name; describe more complex techniques in the Methods section.</i>                                                               |
| <input checked="" type="checkbox"/> | <input type="checkbox"/>            | A description of all covariates tested                                                                                                                                                                                                                     |
| <input checked="" type="checkbox"/> | <input type="checkbox"/>            | A description of any assumptions or corrections, such as tests of normality and adjustment for multiple comparisons                                                                                                                                        |
| <input type="checkbox"/>            | <input checked="" type="checkbox"/> | A full description of the statistical parameters including central tendency (e.g. means) or other basic estimates (e.g. regression coefficient) AND variation (e.g. standard deviation) or associated estimates of uncertainty (e.g. confidence intervals) |
| <input checked="" type="checkbox"/> | <input type="checkbox"/>            | For null hypothesis testing, the test statistic (e.g. $F$ , $t$ , $r$ ) with confidence intervals, effect sizes, degrees of freedom and $P$ value noted<br><i>Give <math>P</math> values as exact values whenever suitable.</i>                            |
| <input checked="" type="checkbox"/> | <input type="checkbox"/>            | For Bayesian analysis, information on the choice of priors and Markov chain Monte Carlo settings                                                                                                                                                           |
| <input checked="" type="checkbox"/> | <input type="checkbox"/>            | For hierarchical and complex designs, identification of the appropriate level for tests and full reporting of outcomes                                                                                                                                     |
| <input checked="" type="checkbox"/> | <input type="checkbox"/>            | Estimates of effect sizes (e.g. Cohen's $d$ , Pearson's $r$ ), indicating how they were calculated                                                                                                                                                         |

*Our web collection on [statistics for biologists](#) contains articles on many of the points above.*

### Software and code

Policy information about [availability of computer code](#)

Data collection

Data were downloaded by fileZilla(3.45.1)

Data analysis

G4 motif sequences were predicted by quadparser version 2.0. Statistical analyses were generated by IBM SPSS Statistics 22.

For manuscripts utilizing custom algorithms or software that are central to the research but not yet described in published literature, software must be made available to editors/reviewers. We strongly encourage code deposition in a community repository (e.g. GitHub). See the Nature Research [guidelines for submitting code & software](#) for further information.

### Data

Policy information about [availability of data](#)

All manuscripts must include a [data availability statement](#). This statement should provide the following information, where applicable:

- Accession codes, unique identifiers, or web links for publicly available datasets
- A list of figures that have associated raw data
- A description of any restrictions on data availability

Links of genome and annotation data:

Saccharomyces cerevisiae [http://fungi.ensembl.org/Saccharomyces\\_cerevisiae/Info/Index](http://fungi.ensembl.org/Saccharomyces_cerevisiae/Info/Index)  
 Plasmodium reichenowi [http://protists.ensembl.org/Plasmodium\\_reichenowi\\_gca\\_001601855/Info/Index](http://protists.ensembl.org/Plasmodium_reichenowi_gca_001601855/Info/Index)  
 Paramecium tetraurelia [http://protists.ensembl.org/Paramecium\\_tetraurelia/Info/Index](http://protists.ensembl.org/Paramecium_tetraurelia/Info/Index)  
 Dictyostelium discoideum [http://protists.ensembl.org/Dictyostelium\\_discoideum/Info/Index](http://protists.ensembl.org/Dictyostelium_discoideum/Info/Index)  
 Schistosoma mansoni [http://metazoa.ensembl.org/Schistosoma\\_mansoni/Info/Index](http://metazoa.ensembl.org/Schistosoma_mansoni/Info/Index)  
 Macrostromum lignano [https://www.ncbi.nlm.nih.gov/genome/?term=Macrostromum\\_lignano](https://www.ncbi.nlm.nih.gov/genome/?term=Macrostromum_lignano)  
 Echinococcus granulosus [https://www.ncbi.nlm.nih.gov/genome/?term=Echinococcus\\_granulosus](https://www.ncbi.nlm.nih.gov/genome/?term=Echinococcus_granulosus)  
 Nematostella vectensis [http://metazoa.ensembl.org/Nematostella\\_vectensis/Info/Index](http://metazoa.ensembl.org/Nematostella_vectensis/Info/Index)

Acropora digitifera [https://www.ncbi.nlm.nih.gov/genome/?term=Acropora\\_digitifera](https://www.ncbi.nlm.nih.gov/genome/?term=Acropora_digitifera)  
 Hydra vulgaris [https://www.ncbi.nlm.nih.gov/genome/?term=Hydra\\_vulgaris](https://www.ncbi.nlm.nih.gov/genome/?term=Hydra_vulgaris)  
 Caenorhabditis elegans [http://metazoa.ensembl.org/Caenorhabditis\\_elegans/Info/Index](http://metazoa.ensembl.org/Caenorhabditis_elegans/Info/Index)  
 Strongyloides ratti [http://metazoa.ensembl.org/Strongyloides\\_ratti/Info/Index](http://metazoa.ensembl.org/Strongyloides_ratti/Info/Index)  
 Brugia malayi [http://metazoa.ensembl.org/Brugia\\_malayi/Info/Index](http://metazoa.ensembl.org/Brugia_malayi/Info/Index)  
 Lottia gigantea [http://metazoa.ensembl.org/Lottia\\_gigantea/Info/Index](http://metazoa.ensembl.org/Lottia_gigantea/Info/Index)  
 Octopus bimaculoides [http://metazoa.ensembl.org/Octopus\\_bimaculoides/Info/Index](http://metazoa.ensembl.org/Octopus_bimaculoides/Info/Index)  
 Crassostrea gigas [http://metazoa.ensembl.org/Crassostrea\\_gigas/Info/Index](http://metazoa.ensembl.org/Crassostrea_gigas/Info/Index)  
 Capitella teleta [http://metazoa.ensembl.org/Capitella\\_teleta/Info/Index](http://metazoa.ensembl.org/Capitella_teleta/Info/Index)  
 Helobdella robusta [http://metazoa.ensembl.org/Helobdella\\_robusta/Info/Index](http://metazoa.ensembl.org/Helobdella_robusta/Info/Index)  
 Apis mellifera [http://metazoa.ensembl.org/Apis\\_mellifera/Info/Index](http://metazoa.ensembl.org/Apis_mellifera/Info/Index)  
 Bombyx mori <http://silkworm.genomics.org.cn/silkbdb/#>  
 Drosophila melanogaster [http://metazoa.ensembl.org/Drosophila\\_melanogaster/Info/Index](http://metazoa.ensembl.org/Drosophila_melanogaster/Info/Index)  
 Danaus plexippus [http://metazoa.ensembl.org/Danaus\\_plexippus/Info/Index](http://metazoa.ensembl.org/Danaus_plexippus/Info/Index)  
 Strongylocentrotus purpuratus [http://metazoa.ensembl.org/Strongylocentrotus\\_purpuratus/Info/Index](http://metazoa.ensembl.org/Strongylocentrotus_purpuratus/Info/Index)  
 Latimeria chalumnae [http://asia.ensembl.org/Latimeria\\_chalumnae/Info/Index](http://asia.ensembl.org/Latimeria_chalumnae/Info/Index)  
 Branchiostoma floridae [https://www.ncbi.nlm.nih.gov/genome/?term=Branchiostoma\\_floridae](https://www.ncbi.nlm.nih.gov/genome/?term=Branchiostoma_floridae)  
 Danio rerio [http://asia.ensembl.org/Danio\\_rerio/Info/Index](http://asia.ensembl.org/Danio_rerio/Info/Index)  
 Xenopus tropicalis [http://asia.ensembl.org/Xenopus\\_tropicalis/Info/Index](http://asia.ensembl.org/Xenopus_tropicalis/Info/Index)  
 Nanorana parkeri [https://www.ncbi.nlm.nih.gov/genome/?term=Nanorana\\_parkeri](https://www.ncbi.nlm.nih.gov/genome/?term=Nanorana_parkeri)  
 Anolis carolinensis [http://asia.ensembl.org/Anolis\\_carolinensis/Info/Index](http://asia.ensembl.org/Anolis_carolinensis/Info/Index)  
 Pelodiscus sinensis [http://asia.ensembl.org/Pelodiscus\\_sinensis/Info/Index](http://asia.ensembl.org/Pelodiscus_sinensis/Info/Index)  
 Alligator sinensis [https://www.ncbi.nlm.nih.gov/genome/?term=Alligator\\_sinensis%5D](https://www.ncbi.nlm.nih.gov/genome/?term=Alligator_sinensis%5D)  
 Gallus gallus [http://asia.ensembl.org/Gallus\\_gallus/Info/Index](http://asia.ensembl.org/Gallus_gallus/Info/Index)  
 Pseudopodoces humilis [https://www.ncbi.nlm.nih.gov/genome/?term=Pseudopodoces\\_humilis](https://www.ncbi.nlm.nih.gov/genome/?term=Pseudopodoces_humilis)  
 Struthio camelus [https://www.ncbi.nlm.nih.gov/genome/?term=Struthio\\_camelus](https://www.ncbi.nlm.nih.gov/genome/?term=Struthio_camelus)  
 Ornithorhynchus anatinus [http://asia.ensembl.org/Ornithorhynchus\\_anatinus/Info/Index](http://asia.ensembl.org/Ornithorhynchus_anatinus/Info/Index)  
 Ovis aries [http://asia.ensembl.org/Ovis\\_aries/Info/Index](http://asia.ensembl.org/Ovis_aries/Info/Index)  
 Homo sapiens [http://asia.ensembl.org/Homo\\_sapiens/Info/Index](http://asia.ensembl.org/Homo_sapiens/Info/Index)  
 Go annotation data:  
<http://asia.ensembl.org/biomart/martview/a711e156a54e647e61290eadf58122a5>

## Field-specific reporting

Please select the one below that is the best fit for your research. If you are not sure, read the appropriate sections before making your selection.

Life sciences  Behavioural & social sciences  Ecological, evolutionary & environmental sciences

For a reference copy of the document with all sections, see [nature.com/documents/nr-reporting-summary-flat.pdf](https://www.nature.com/documents/nr-reporting-summary-flat.pdf)

## Life sciences study design

All studies must disclose on these points even when the disclosure is negative.

|                 |                                                                                                                                                                                                                                |
|-----------------|--------------------------------------------------------------------------------------------------------------------------------------------------------------------------------------------------------------------------------|
| Sample size     | Specific sample sizes are described in figures or figure legends. The sample size used for experiment is based on previous experience from the Xiang and Feng labs. No statistical test was used to pre-determine sample size. |
| Data exclusions | No samples or animals were excluded from the analyses.                                                                                                                                                                         |
| Replication     | The number of repeats for each experiments are described in corresponding figure legends. All repeats support the same conclusion.                                                                                             |
| Randomization   | Cells or animal tissue were randomly assigned to groups.                                                                                                                                                                       |
| Blinding        | No, we were not blinded to group allocation. The results are from the bioinformatic analyses on the resequencing data, which are not a bit influenced by personal mind.                                                        |

## Reporting for specific materials, systems and methods

We require information from authors about some types of materials, experimental systems and methods used in many studies. Here, indicate whether each material, system or method listed is relevant to your study. If you are not sure if a list item applies to your research, read the appropriate section before selecting a response.

## Materials &amp; experimental systems

|                                     |                                                                 |
|-------------------------------------|-----------------------------------------------------------------|
| n/a                                 | Involvement in the study                                        |
| <input type="checkbox"/>            | <input checked="" type="checkbox"/> Antibodies                  |
| <input type="checkbox"/>            | <input checked="" type="checkbox"/> Eukaryotic cell lines       |
| <input checked="" type="checkbox"/> | <input type="checkbox"/> Palaeontology                          |
| <input type="checkbox"/>            | <input checked="" type="checkbox"/> Animals and other organisms |
| <input checked="" type="checkbox"/> | <input type="checkbox"/> Human research participants            |
| <input checked="" type="checkbox"/> | <input type="checkbox"/> Clinical data                          |

## Methods

|                                     |                                                 |
|-------------------------------------|-------------------------------------------------|
| n/a                                 | Involvement in the study                        |
| <input checked="" type="checkbox"/> | <input type="checkbox"/> ChIP-seq               |
| <input checked="" type="checkbox"/> | <input type="checkbox"/> Flow cytometry         |
| <input checked="" type="checkbox"/> | <input type="checkbox"/> MRI-based neuroimaging |

## Antibodies

|                 |                                                                                                                                                                                                                                                                                                                                                                                                                                             |
|-----------------|---------------------------------------------------------------------------------------------------------------------------------------------------------------------------------------------------------------------------------------------------------------------------------------------------------------------------------------------------------------------------------------------------------------------------------------------|
| Antibodies used | BG4 (Ab00174-1.6, Absolute antibody, Oxford, UK) ; anti-His antibody (B1023, Beijing Biodragon ImmunoTechnologies, Beijing, China) ; anti-rabbit Alexa 594-conjugated (A11037, Invitrogen, CA, USA)                                                                                                                                                                                                                                         |
| Validation      | BG4: This chimeric mouse antibody Fab-fragment was made using the variable domain sequences of the original Human scFv format, for improved compatibility with existing reagents, assays and techniques. It does not have a FLAG-tag, but a His-tag, which may be used for detection.<br>anti-His antibody: The antigen of this antibody is synthetic peptide corresponding to residues H H H H H H. This antibody were produced in rabbit. |

## Eukaryotic cell lines

Policy information about [cell lines](#)

|                                                                   |                                                                                                                                                                                                                        |
|-------------------------------------------------------------------|------------------------------------------------------------------------------------------------------------------------------------------------------------------------------------------------------------------------|
| Cell line source(s)                                               | Drosophila melanogaster KC cells, Gallus gallus DF-1 cells and Homo sapiens LO2 cells were obtained from the American Type Culture Collection. Ovis aries OAR-L1 cells were provided by Kunming Instituted of Zoology. |
| Authentication                                                    | KC, DF-1, OAR-L1 and LO2 cells were authenticated based on our experience working with these cell lines, such as cell morphology, culture conditions, etc.                                                             |
| Mycoplasma contamination                                          | Cells were routinely tested for mycoplasma contamination, and only negative cells were used in experiments.                                                                                                            |
| Commonly misidentified lines (See <a href="#">ICLAC</a> register) | None of the cell lines used are listed in the database of commonly misidentified cell lines maintained by ICLAC.                                                                                                       |

## Animals and other organisms

Policy information about [studies involving animals](#); [ARRIVE guidelines](#) recommended for reporting animal research

|                         |                                                                                                                                                                                                                                                                                             |
|-------------------------|---------------------------------------------------------------------------------------------------------------------------------------------------------------------------------------------------------------------------------------------------------------------------------------------|
| Laboratory animals      | The adult fish of Danio rerio (male) were purchased from China Zebrafish Resource Center (CZRC Catalog ID: CF1), and were used to generate Danio rerio cells. The Pelodiscus sinensis were purchased from Pelodiscus sinensis farmers, and were used to generate Pelodiscus sinensis cells. |
| Wild animals            | The study did not involve samples collected from wild animals.                                                                                                                                                                                                                              |
| Field-collected samples | The study did not involve samples collected from field.                                                                                                                                                                                                                                     |
| Ethics oversight        | All animal protocols were approved by Institutional Animal Care and Use Committee (ACUP) at the University of Chicago.                                                                                                                                                                      |

Note that full information on the approval of the study protocol must also be provided in the manuscript.
